# Supplementary material for: Amending solid carbon from methane cracking to arable soils: A sustainable approach to increase carbon storage and heavy metal immobilization?
Source: Copernicus journal article supplement (doi:10.5194/egusphere-2025-3866), 2025-09-29
Supplement: Supplementary file 1 [file egusphere-2025-3866-supplement.pdf]

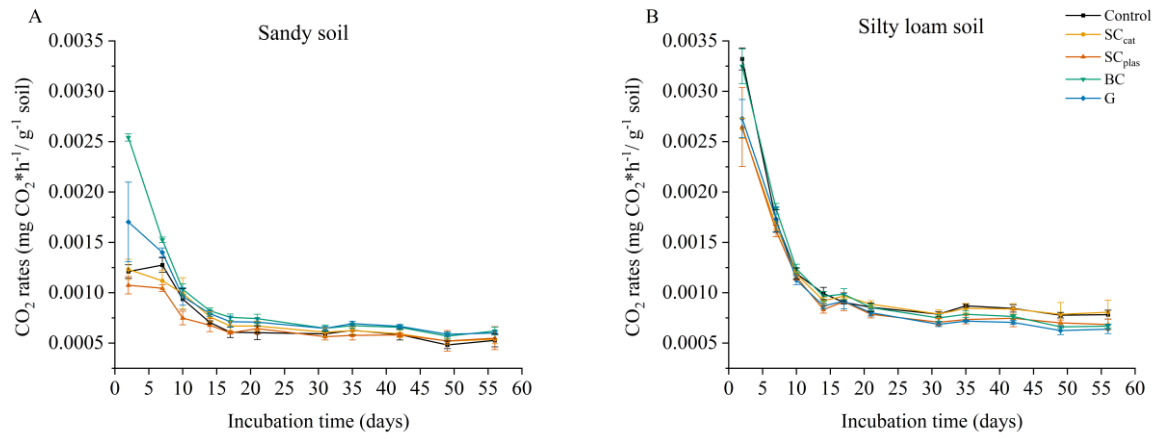

**Figure S1** CO<sub>2</sub> production rates evolved during 56 days of incubation after addition of 40 t ha<sup>-1</sup> test material (mean and standard error, n = 4). Treatments were C: control, SC<sub>cat</sub>: solid carbon from catalytic pyrolysis, SC<sub>plas</sub>: solid carbon plasma pyrolysis, BC: Biochar, and G: Graphite.
